# Supplementary material for: Impact of Predicting Health Care Utilization Via Web Search Behavior: A Data-Driven Analysis
Source: PubMed Central journal article supplement (PMC5052461; doi:10.2196/jmir.6240), 2016-09-21
Supplement: jmir_v18i9e251_app1.pdf [file jmir_v18i9e251_app1.pdf]

## APPENDIX B

### Interval Reduction Score

The interval reduction score for a search user and a given search day, represents the proportion of successively shortening inter-search intervals that occur within the searches for the given user and search day. Given time stamps for the  $i^{\text{th}}$  and  $(i+1)^{\text{th}}$  search session for search user  $j$  on search day  $d$  let,

$$p_i = t_i - t_{i-1}$$

The average number of successively shortening intervals on a day with  $n_{j,d}$  healthcare searches is given by

$$\frac{1}{(n_{j,d} - 1)} \sum_i^{n_{j,d} - 1} k I \cdot (p_i > p_{i+1})$$

where  $k$  is a weight factor =  $1 + w$

The above is the same as

$$\frac{1}{(n_{j,d} - 1)} \sum_i^{n_{j,d} - 1} k I \cdot (2t_i - t_{i+1} - t_{i-1} > 0)$$
