# Supplementary material for: Impact of Predicting Health Care Utilization Via Web Search Behavior: A Data-Driven Analysis
Source: J Med Internet Res. 2016 Sep 21;18(9):e251. doi: 10.2196/jmir.6240 (PMC5052461; doi:10.2196/jmir.6240)
Supplement: Supplementary file 2 [file jmir_v18i9e251_app2.pdf]

APPENDIX A

| Top 30 positive day-wise features | Top 30 negative day-wise features |
|-----------------------------------|-----------------------------------|
|-----------------------------------|-----------------------------------|

| RF | Ridge            | L1               | Elastic net      | RF               | Ridge | L1               | Elastic net |                  |                  |
|----|------------------|------------------|------------------|------------------|-------|------------------|-------------|------------------|------------------|
| 1  | d7<br>_00        | d4<br>_00        | d1<br>_00        | d8<br>_0         | 1     | d5<br>_0         | d11<br>_0   | d10<br>_0        | d9<br>_00        |
| 2  | d6<br>_00        | d3<br>_00        | d3<br>_00        | d1<br>_0         | 2     | d4<br>_0         | d4_two      | d3<br>_0         | d4<br>_0         |
| 3  | d5<br>_00        | d4<br>_0         | d9<br>_six       | d4<br>_0         | 3     | d3<br>_0         | d7<br>_0    | d15<br>_00       | d12<br>_two      |
| 4  | d1<br>_00        | d4<br>_0         | d2<br>_0         | d2<br>_00        | 4     | d6<br>_0         | d13<br>_0   | d3_six           | d11<br>_0        |
| 5  | d1<br>2_nurse    | d6<br>_0         | d1<br>5_doctor   | d4<br>_homeVisit | 5     | d6<br>_0         | d6<br>_0    | d15<br>_0        | d9<br>_0         |
| 6  | d7<br>_nurse     | d1<br>_0         | d5<br>_0         | d9<br>_0         | 6     | d12<br>_how      | d4<br>_0    | d7<br>_00        | d8<br>_0         |
| 7  | d8<br>_00        | d3<br>_0         | d7<br>_six       | d3<br>_00        | 7     | d5<br>_0         | d8<br>_00   | d1<br>_0         | d4<br>_0         |
| 8  | d3<br>_00        | d1<br>2_0        | d2<br>_homeVisit | d2<br>_HE        | 8     | d15<br>_year2015 | d6_two      | d5<br>_0         | d3<br>_0         |
| 9  | d2<br>_00        | d1<br>4_0        | d2<br>_00        | d1<br>4_00       | 9     | d15<br>_00       | d6<br>_00   | d9<br>_00        | d11<br>_000      |
| 10 | d6<br>_irs       | d1<br>2_doctor   | d1<br>1_0        | d1<br>_00        | 10    | d2<br>_0         | d1<br>_00   | d10<br>_00       | d11<br>_year2015 |
| 11 | d1<br>5_0        | d7<br>_0         | d9<br>_0         | d1<br>4_0        | 11    | d11<br>_0        | d11<br>_0   | d13<br>_0        | d10<br>_0        |
| 12 | d1<br>1_0        | d1<br>2_six      | d8<br>_0         | d7<br>_0         | 12    | d3<br>_0         | d3<br>_0    | d15<br>_00       | d8<br>_00        |
| 13 | d1<br>4_0        | d1<br>5_0        | d4<br>_00        | d8<br>_doctor    | 13    | d11<br>_0        | d5<br>_0    | d6<br>_0         | d2<br>_0         |
| 14 | d1<br>2_0        | d1<br>2_0        | d1<br>3_0        | d1<br>1_00       | 14    | d1<br>_0         | d6<br>_0    | d1<br>_0         | d8<br>_0         |
| 15 | d1<br>_qid_count | d5<br>_0         | d1<br>_00        | d1<br>4_0        | 15    | d4<br>_0         | d11<br>_0   | d12<br>_0        | d11<br>_0        |
| 16 | d8<br>_how       | d8<br>_0         | d5<br>_00        | d1<br>3_0        | 16    | d15<br>_0        | d12<br>_0   | d6<br>_0         | d3<br>_0         |
| 17 | d2<br>_three     | d1<br>_qid_count | d2<br>_00        | d1<br>2_0        | 17    | d10<br>_0        | d15<br>_0   | d2_one           | d13<br>_year2015 |
| 18 | d1<br>3_0        | d1<br>_0         | d1<br>_0         | d1<br>_0         | 18    | d1<br>_00        | d9<br>_0    | d4_six           | d9<br>_00        |
| 19 | d6<br>_AC_h      | d1<br>5_0        | d7<br>_0         | d1<br>5_0        | 19    | d13<br>_two      | d3<br>_0    | d10<br>_00<br>_0 | d2<br>_year2014  |
| 20 | d1<br>_0         | d2<br>_0         | d1<br>0_nurse    | d3<br>_0         | 20    | d1<br>_0         | d13<br>_00  | d5<br>_0         | d12<br>_0        |
| 21 | d1<br>5_0        | d1<br>0_0        | d9<br>_0         | d9<br>_irs       | 21    | d5<br>_0         | d14<br>_0   | d12_tw<br>_0     | d9<br>_0         |
|    | d1               | d1               | d6               | d8               |       | d12              |             |                  | d10              |

|             |               |            |                  |               |    |             |             |             |          |
|-------------|---------------|------------|------------------|---------------|----|-------------|-------------|-------------|----------|
| 2<br>2      | 0_            | 4_         | _                | _             | 22 | _           | d10_        | d5_two      | _        |
| 2<br>2<br>3 | d1<br>5_      | d1<br>3_   | d1<br>2_         | d1<br>5_      | 23 | d15<br>_    | d15_        | d6_         | d13<br>_ |
| 2<br>4      | d5<br>_       | d5<br>_    | d1<br>0_         | d1<br>1_      | 24 | d11<br>_two | d1_         | d15_tw<br>o | d4_<br>_ |
| 2<br>5      | d4<br>_       | d1<br>1_AC | d4<br>_qid_count | d1<br>4_nurse | 25 | d15<br>_two | d17_        | d8_         | d6_<br>_ |
| 2<br>6      | d1<br>_doctor | d8<br>_    | d2<br>_          | d7<br>_       | 26 | d13<br>_    | d13_        | d2_         | d12<br>_ |
| 2<br>7      | d4<br>_       | d3<br>_    | d1<br>4_avgic    | d1<br>5_      | 27 | d4_<br>one  | d14_        | d3_         | d9_<br>_ |
| 2<br>8      | d4<br>_       | d1<br>1_   | d4<br>_          | d2<br>_       | 28 | d2_<br>_    | d11_        | d15_        | d2_<br>_ |
| 2<br>9      | d1<br>2_      | d1<br>3_   | d6<br>_          | d9<br>_       | 29 | d2_<br>two  | d12_ho<br>w | d5_         | d1_<br>_ |
| 3<br>0      | d1<br>2_      | d8<br>_    | d1<br>3_doctor   | d1<br>3_      | 30 | d15<br>_    | d10_        | d7_         | d11<br>_ |
